# Supplementary material for: Synthesis, crystal structures and reactivity of copper(i) amidate complexes with aryl halides: insight into copper(i)-catalyzed Goldberg reaction
Source: Royal Society of Chemistry journal article supplement (doi:10.1039/c2dt00050d), 2012-01-01
Supplement: c2dt00050d.pdf [file c2dt00050d.pdf]

## Supporting information

### Synthesis, Crystal Structures, and Reactivity of Copper(I) amidate Complexes: a insight into the mechanism of copper(I)-catalyze amide arylation reaction

Xinfang Liu, Songlin Zhang and Yuqiang Ding

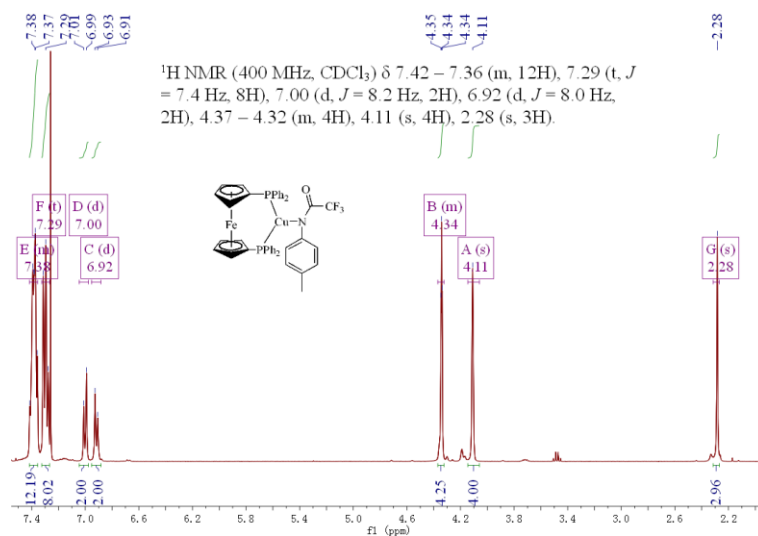

Fig S1. <sup>1</sup>H NMR spectrum of complex 2 recorded at 400 MHz in CDCl<sub>3</sub> at 293 K.

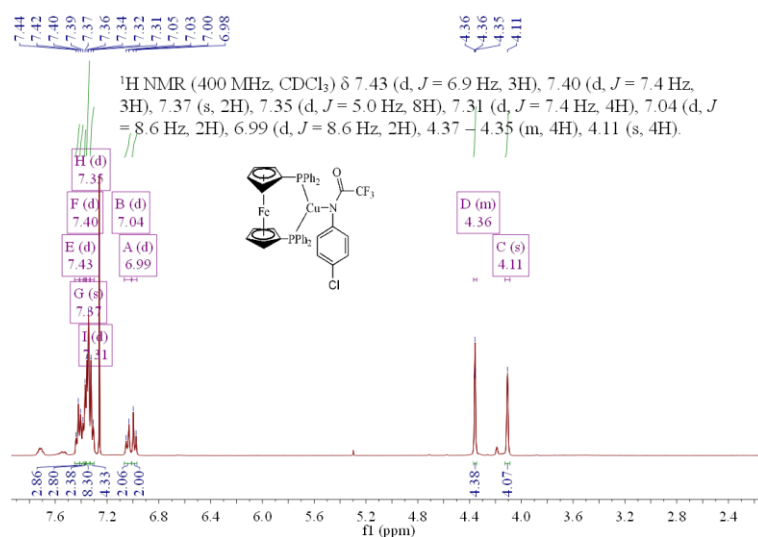

Fig S2. <sup>1</sup>H NMR spectrum of complex 3 recorded at 400 MHz in CDCl<sub>3</sub> at 293 K.

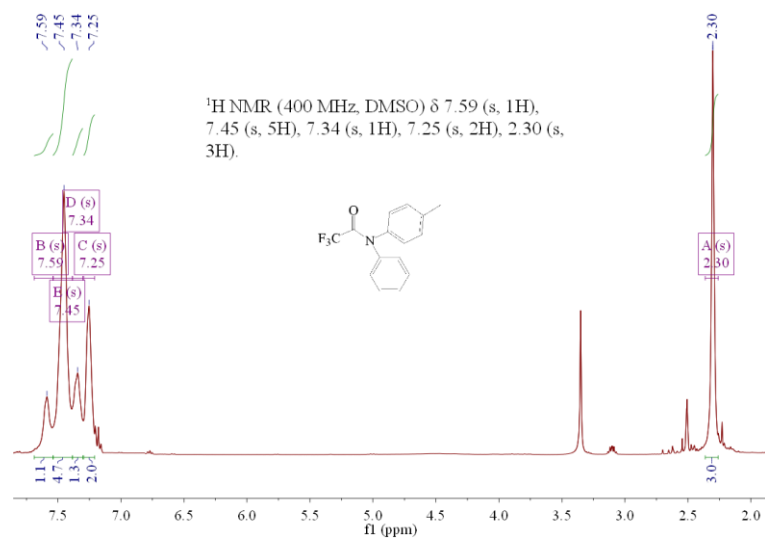

Fig S3.  $^1\text{H NMR}$  spectrum of compound **5** recorded at 400 MHz in  $\text{CDCl}_3$  at 293 K.

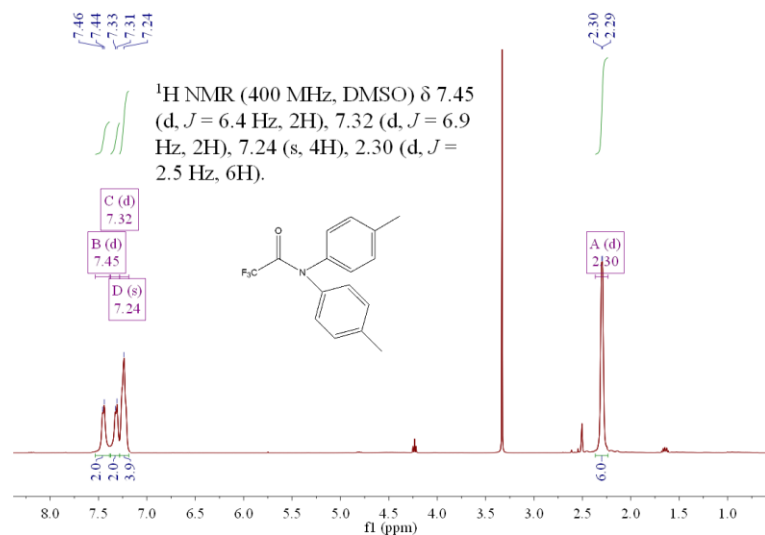

Fig S4.  $^1\text{H NMR}$  spectrum of compound **6** recorded at 400 MHz in  $\text{CDCl}_3$  at 293 K.

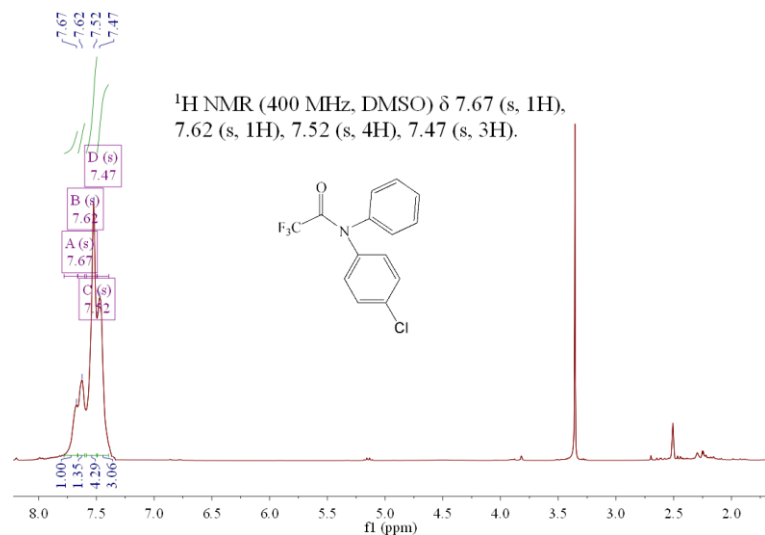

Fig S5.  $^1\text{H}$  NMR spectrum of compound **7** recorded at 400 MHz in  $\text{CDCl}_3$  at 293 K.

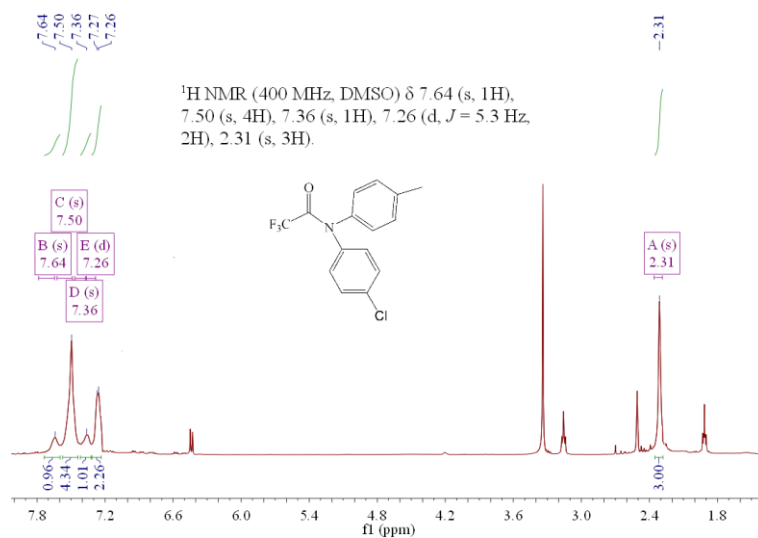

Fig S6.  $^1\text{H}$  NMR spectrum of compound **8** recorded at 400 MHz in  $\text{CDCl}_3$  at 293 K.

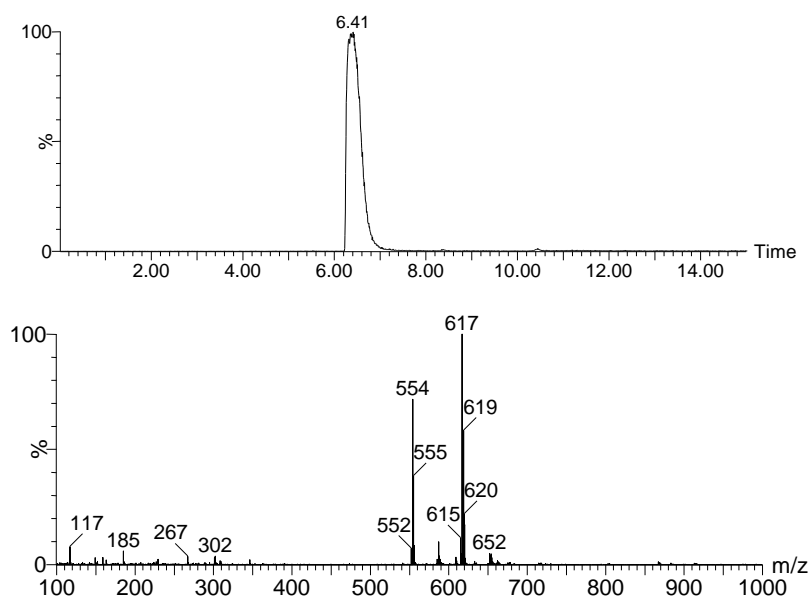

Fig. S7 LC-MS/MS chromatograms for the analysis of compound **4**

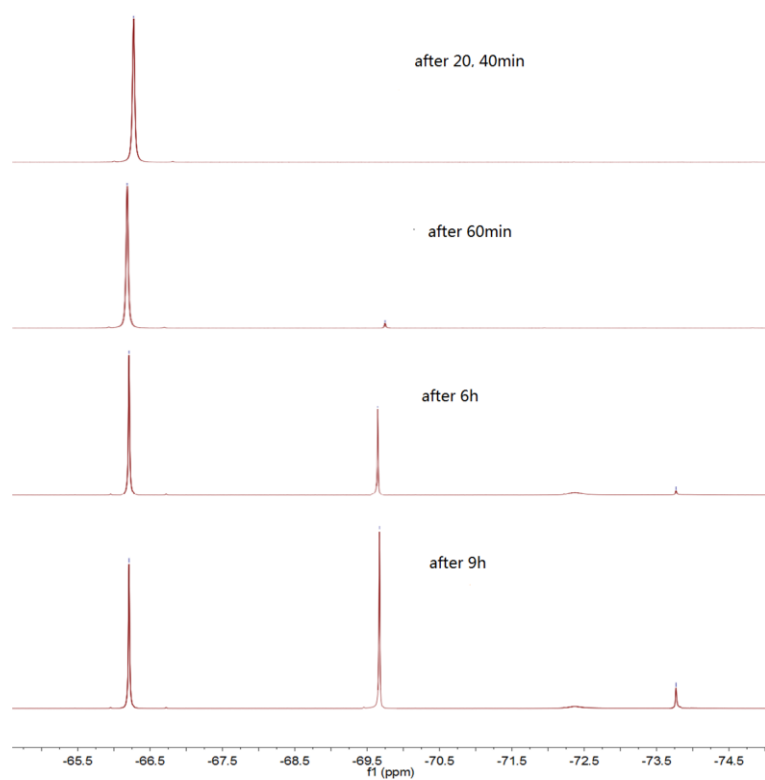

Fig S8. the time course of the  $^{19}\text{F}$  NMR signals of the reaction of complex **2** with iodobenzene
